# Supplementary material for: Risk Assessment of Dengue Transmission in Bangladesh Using a Spatiotemporal Network Model and Climate Data
Source: PubMed Central journal article supplement — Am J Trop Med Hyg. 2021 Jan 18;104(4):1444–55. doi: 10.4269/ajtmh.20-0444 (PMC8045636; doi:10.4269/ajtmh.20-0444), 2021-01-18
Supplement: tpmd200444.SD1.pdf [file tpmd200444.SD1.pdf]

The following are supplemental materials and will be published online only

## Supplemental Material

Simulations were performed for two-month lagged climate data. These results were similar to the one-month lagged climate data while results shifted one month. Risk maps were similar to one-month lagged data. Simulation results are presented in the following section.

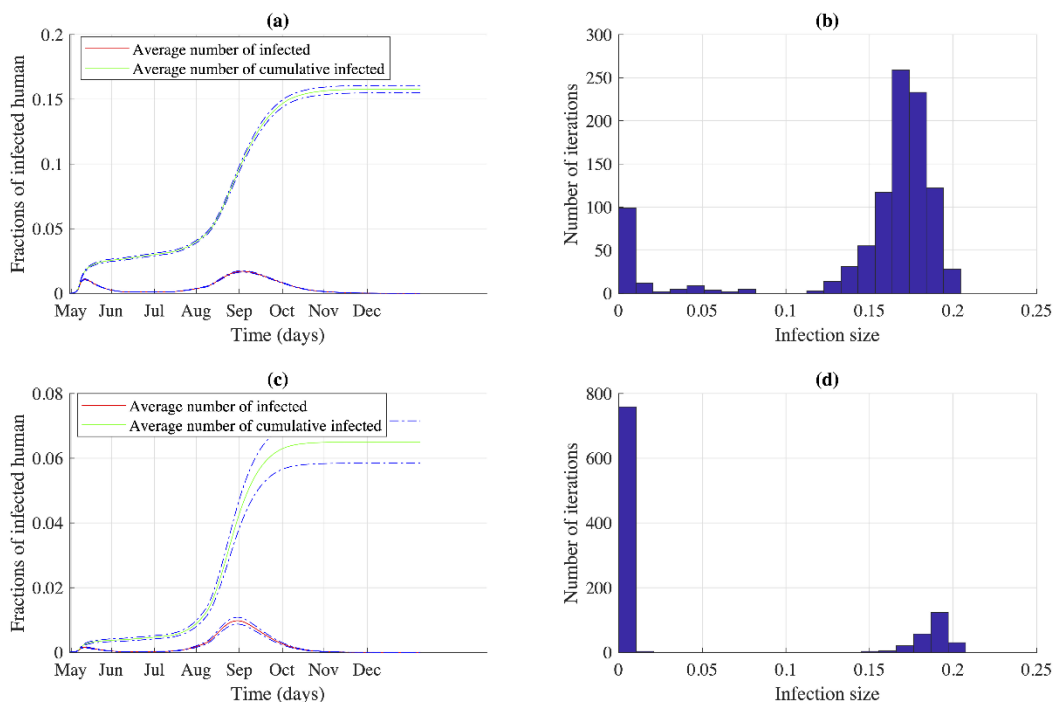

**Supporting Fig. 1: Transmission dynamics of dengue in Bangladesh when the simulation started in Dhaka with two-month lagged climate data and district-level movement network (b) Corresponding histogram (c) Spreading dynamics of dengue in Bangladesh when the simulation started in Chittagong with two-month lagged climate data and district-level movement network (d) Corresponding histogram**

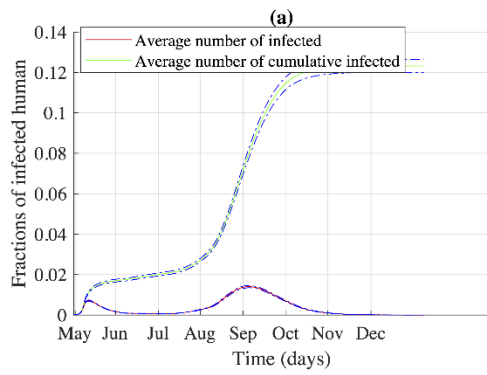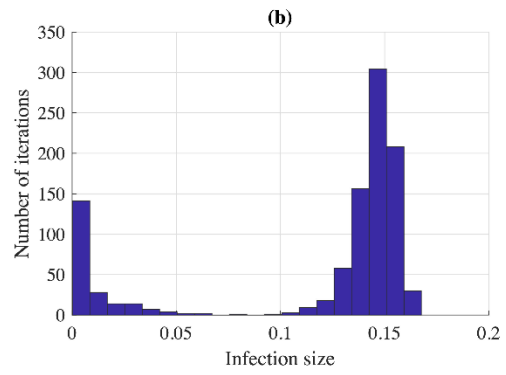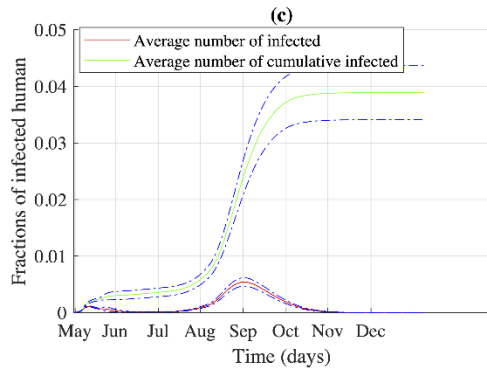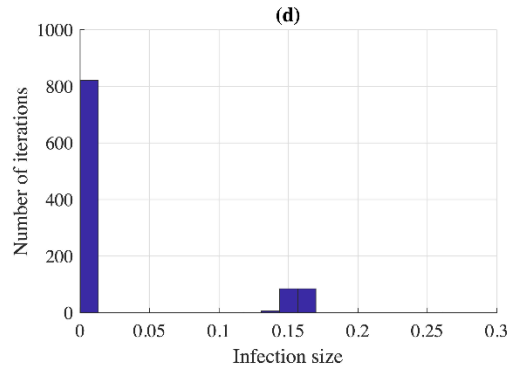

**Supporting Fig. 2: Transmission dynamics of dengue in Bangladesh when the simulation started in Dhaka with two-month lagged climate data and division-level movement network (b) Corresponding histogram (c) Spreading dynamics of dengue in Bangladesh when the simulation started in Chittagong with two-month lagged climate data and division-level movement network (d) Corresponding histogram**
